# Supplementary material
Source: Springer Nature journal article supplement (http://www.springermedizin.de/resource/supplementary/13014_2010_330_MOESM3_ESM.pdf/9633584)

Day 0

Day 1

Day 3

Day 7

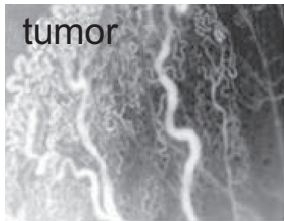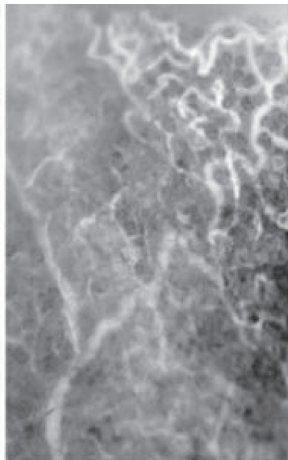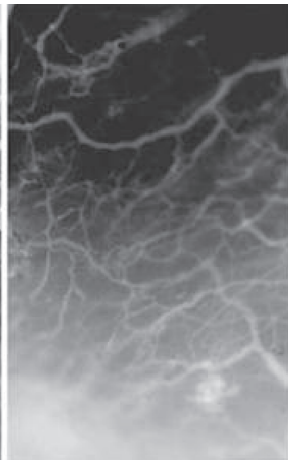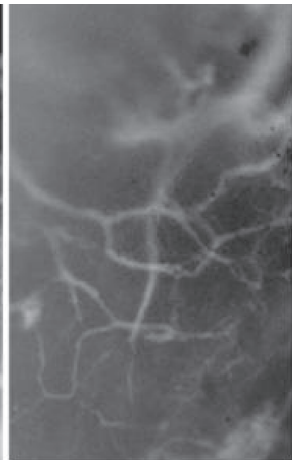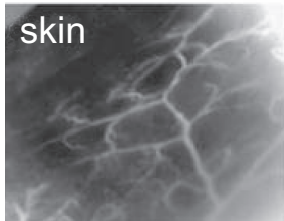

Supplement: MOESM3 [file 9633584]
